# Supplementary material for: Drivers of microplastic pollution in soil sediments at fish landing centers in Sri Vijaya Puram (Port Blair), South Andaman Island
Source: PeerJ. 2025 Sep 5;13:e19965. doi: 10.7717/peerj.19965 (PMC12422275; doi:10.7717/peerj.19965)
Supplement: Supplemental Information 2 — All raw microplastic data used for statistical analysis, including abundance, shape, color, PCA, NMDS and location-wise counts for each sample. [file peerj-13-19965-s002.xlsx]

## Sheet: Abundance
Region	Sampling_Station	Total (per 200 g)	MEAN Station_wise /200g	Station wise_Per/kg	Total particles/kg	SD		Total HTL	Total LTL
North	Chatham (HTL)	83	64.33	321.65	386	13.97	Chatham	205	181
North	Chatham (HTL)	73
North	Chatham (HTL)	49
North	Chatham (LTL)	68
North	Chatham (LTL)	66
North	Chatham (LTL)	47
North	Dignabad (HTL)	26	24.83	124.15	149	4.12	Dignabad	85	64
North	Dignabad (HTL)	29
North	Dignabad (HTL)	30
North	Dignabad (LTL)	20
North	Dignabad (LTL)	22
North	Dignabad (LTL)	22
North	Janglighat (HTL)	85	61.67	308.35	370	16.5	Janglighat	215	155
North	Janglighat (HTL)	74
North	Janglighat (HTL)	56
North	Janglighat (LTL)	66
North	Janglighat (LTL)	48
North	Janglighat (LTL)	41
South	Wandoor (HTL)	12	11	55	66	0.89	Wandoor	33	33
South	Wandoor (HTL)	10
South	Wandoor (HTL)	11
South	Wandoor (LTL)	11
South	Wandoor (LTL)	12
South	Wandoor (LTL)	10
South	Guptapara (HTL)	19	17.33	86.65	104	6.87	Guptapara	69	35
South	Guptapara (HTL)	21
South	Guptapara (HTL)	29
South	Guptapara (LTL)	13
South	Guptapara (LTL)	12
South	Guptapara (LTL)	10
South	Chidiyatapu(HTL)	42	34.67	173.35	208	5.61	Chidiyatapu	108	100
South	Chidiyatapu(HTL)	33
South	Chidiyatapu(HTL)	33
South	Chidiyatapu (LTL)	41
South	Chidiyatapu (LTL)	28
South	Chidiyatapu (LTL)	31
		1283	35.6389			22.8037

## Sheet: PCA_Data
Region	Site	Tree cover	Grassland	Cropland	Built-up	Bare / sparse vegetation	Water bodies	Mangrove	Population density	Microplastic abundance
North	Chatham	0.6239	0.0067	0.0028	0.5756	0.0057	0.0785	0	96.42	193
North	Dignabad	0.4291	0.0492	0.0004	0.7671	0.0017	0.0587	0	129.63	74.5
North	Janglighat	1.1425	0.0474	0.0024	1.1371	0.0299	0.0552	0.0033	108.95	185
South	Wandoor	1.1325	0.1111	0.0187	0.0038	0.007	0.2404	0.0385	21.63	33
South	Guptapara	1.8545	0.2048	0.0275	0.0013	0.0004	0.002	0.3867	7.52	52
South	Chidiyatapu	1.3332	0.1191	0.0086	0.0017	0.0005	0.2072	0.1073	6.56	104

## Sheet: Colour
Colour/Location	Chatham	Dignabad	Janglighat	Wandoor	Guptapara	Chidiyatapu	Total
Blue	52	3	35	1	5	7	103
Green	19	22	54	18	13	18	144
Red	48	14	57	10	13	35	177
Balck	47	15	31	9	14	28	144
Purple	39	29	52	0	2	30	152
White	53	18	34	20	24	31	180
Aash	51	19	54	0	12	17	153
Brown	42	20	30	0	10	22	124
Transparent	35	9	23	8	11	20	106
Relative colour composition (%)
Colour/Location	Chatham	Dignabad	Janglighat	Wandoor	Guptapara	Chidiyatapu	Overall Colour Composition (%)
Blue	13.5	2	9.5	1.5	4.8	3.4	8.03
Green	4.9	14.8	14.6	27.3	12.5	8.7	11.22
Red	12.4	9.4	15.4	15.2	12.5	16.8	13.8
Black	12.2	10.1	8.4	13.6	13.5	13.5	11.22
Purple	10.1	19.5	14.1	0	1.9	14.4	11.85
White	13.7	12.1	9.2	30.3	23.1	14.9	14.03
Ash	13.2	12.8	14.6	0	11.5	8.2	11.93
Brown	10.9	13.4	8.1	0	9.6	10.6	9.66
Transparent	9.1	6	6.2	12.1	10.6	9.6	8.26

## Sheet: Shape
Shape	Chatham	Dignabad	Janglighat	Wandoor	Guptapara	Chidiyatapu	TOTAL Particles
Film	91	14	100	25	0	38	268
Fragments	102	39	68	11	35	103	358
Fiber	60	19	75	19	47	59	279
Foam	74	42	70	4	5	0	195
Paint Particles	59	35	57	7	17	8	183
Relative(%)
Location	Chatham	Dignabad	Janglighat	Wandoor	Guptapara	Chidiyatapu	Overall Shape composition (%)
Film	23.6	9.4	27	37.9	0	18.3	20.89
Fragments	26.4	26.2	18.4	16.7	33.7	49.5	27.9
Fiber	15.5	12.8	20.3	28.8	45.2	28.4	21.75
Foam	19.2	28.2	18.9	6.1	4.8	0	15.2
Paint Particles	15.3	23.5	15.4	10.6	16.3	3.8	14.26

## Sheet: NMDS_Shape
Location	Zone	Film	Fragments	Fiber	Foam	Paint Particles
Jungli Gut	HTL	31	14	13	14	13
Jungli Gut	HTL	19	11	17	16	11
Jungli Gut	HTL	13	12	9	13	9
Jungli Gut	LTL	22	12	13	11	8
Jungli Gut	LTL	8	13	9	9	9
Jungli Gut	LTL	7	6	14	7	7
Dignabad	HTL	5	7	2	6	6
Dignabad	HTL	1	9	4	11	4
Dignabad	HTL	3	5	6	14	2
Dignabad	LTL	4	7	0	5	4
Dignabad	LTL	0	5	3	4	10
Dignabad	LTL	1	6	4	2	9
Wandoor	HTL	7	2	1	0	2
Wandoor	HTL	5	1	3	0	1
Wandoor	HTL	5	1	4	0	1
Wandoor	LTL	4	2	2	1	2
Wandoor	LTL	2	2	4	3	1
Wandoor	LTL	2	3	5	0	0
Guptapahar	HTL	0	8	8	0	3
Guptapahar	HTL	0	7	11	0	3
Guptapahar	HTL	0	11	8	5	5
Guptapahar	LTL	0	4	7	0	2
Guptapahar	LTL	0	2	9	0	1
Guptapahar	LTL	0	3	4	0	3
Chidiyatapu	HTL	5	22	13	0	2
Chidiyatapu	HTL	7	15	10	0	1
Chidiyatapu	HTL	7	17	8	0	1
Chidiyatapu	LTL	4	23	11	0	3
Chidiyatapu	LTL	7	12	9	0	0
Chidiyatapu	LTL	8	14	8	0	1
Chatham	HTL	21	23	12	14	13
Chatham	HTL	18	18	14	12	11
Chatham	HTL	6	12	8	14	9
Chatham	LTL	18	21	8	13	8
Chatham	LTL	16	19	12	12	7
Chatham	LTL	12	9	6	9	11

## Sheet: Locations
Site	Latitude	Longitude
Chatham	11.6825	92.7229
Dignabad	11.675	92.7444
Janglighat	11.6595	92.7294
Wandoor	11.5939	92.6089
Guptapara	11.5564	92.6544
Chidiyatapu	11.5047	92.7006
						,
